# Supplementary material for: Clomifene and Assisted Reproductive Technology in Humans Are Associated with Sex-Specific Offspring Epigenetic Alterations in Imprinted Control Regions
Source: MDPI journal article supplement (doi:10.3390/ijms231810450), 2022-09-09
Supplement: s1 [file s1]

# Associations Clomifene Only and ICR Methylation

Change in CpG Methylation %

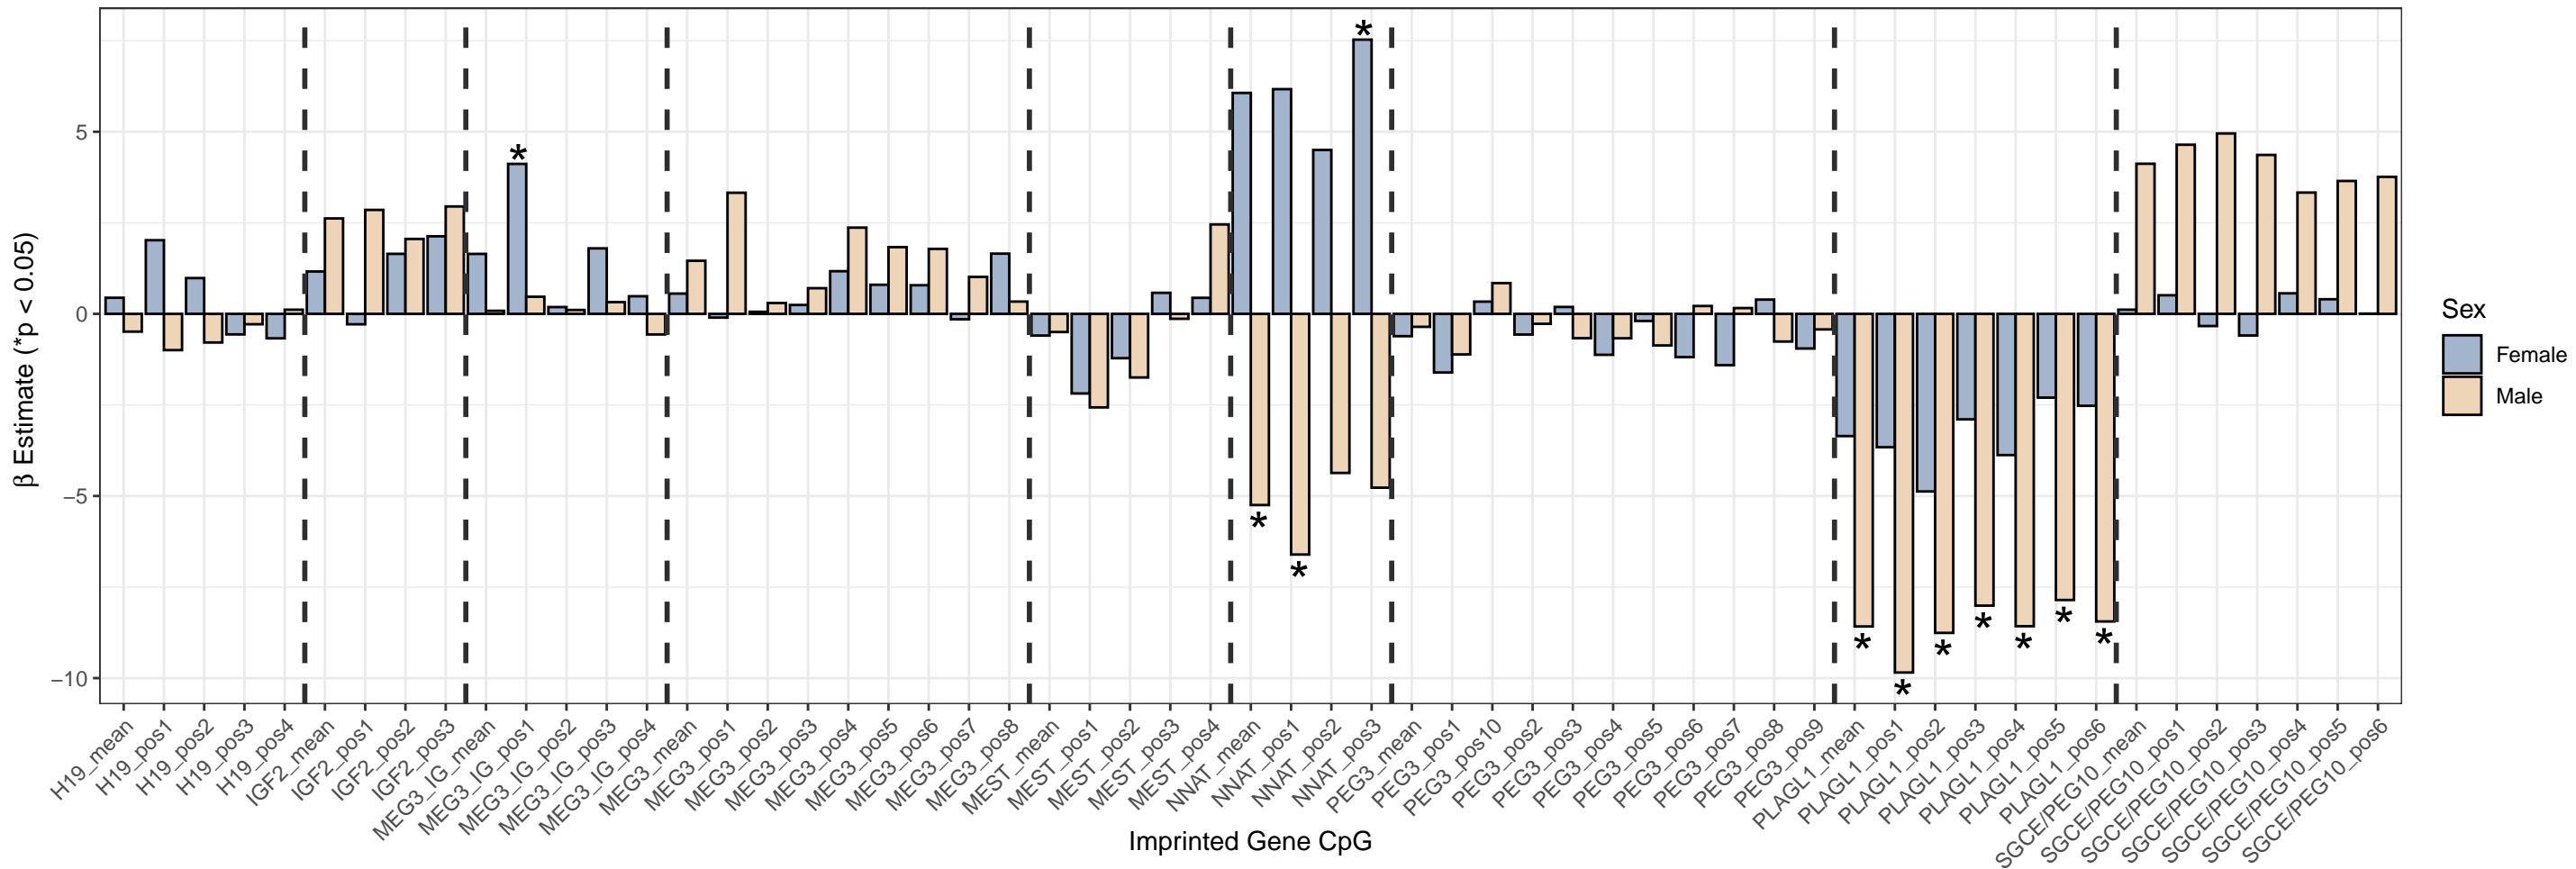

Linear regression for Clomifene only use for the index pregnancy and CpG methylation. We stratified models by sex and adjusted for pyrosequencing batch, pre-pregnancy maternal BMI, race, maternal age, diabetes, and parity. Estimates represent the mean percentage of methylation change associated with maternal use of Clomifene (\*p < 0.05).
