# Supplementary material for: Clomifene and Assisted Reproductive Technology in Humans Are Associated with Sex-Specific Offspring Epigenetic Alterations in Imprinted Control Regions
Source: MDPI journal article supplement (doi:10.3390/ijms231810450), 2022-09-09
Supplement: s1 [file s1]

# ART ET/ICSI and Offspring Methylation

Change in Mean Methylation %

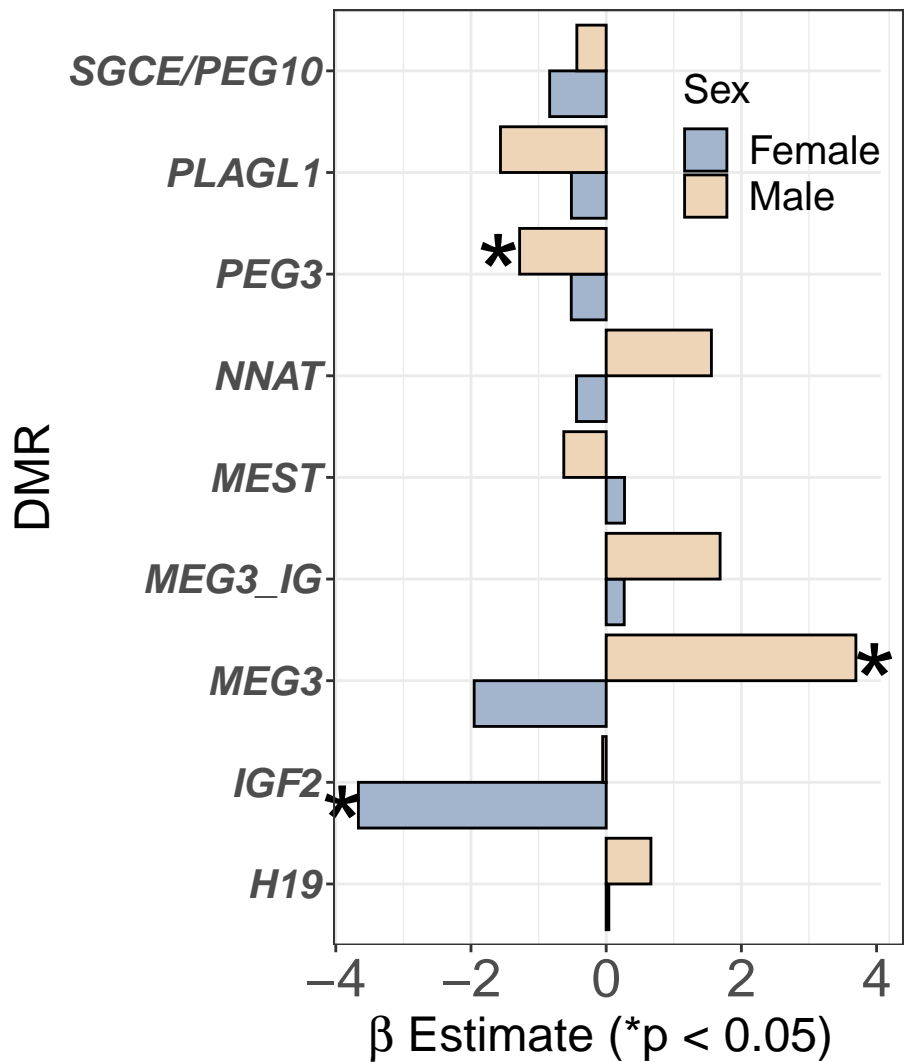

|                     | Cases(n)  | Controls(n) | Estimate(95%CI)      | Pvalue |
|---------------------|-----------|-------------|----------------------|--------|
| <i>SGCE/PEG10-M</i> | 10        | 182         | -0.43 (-1.99, 1.12)  | 0.582  |
| <i>SGCE/PEG10-F</i> | 12        | <b>169</b>  | -0.84 (-2.36, 0.69)  | 0.281  |
| <i>PLAGL1-M</i>     | 9         | <b>191</b>  | -1.56 (-5.17, 2.05)  | 0.394  |
| <i>PLAGL1-F</i>     | 13        | <b>178</b>  | -0.51 (-3.92, 2.89)  | 0.766  |
| <i>PEG3-M</i>       | 8         | <b>184</b>  | -1.28 (-2.45, -0.11) | 0.032  |
| <i>PEG3-F</i>       | <b>13</b> | <b>159</b>  | -0.52 (-1.81, 0.78)  | 0.432  |
| <i>NNAT-M</i>       | 9         | <b>170</b>  | 1.56 (-2.51, 5.62)   | 0.451  |
| <i>NNAT-F</i>       | 11        | <b>157</b>  | -0.44 (-3.82, 2.94)  | 0.797  |
| <i>MEST-M</i>       | 10        | <b>174</b>  | -0.63 (-3.29, 2.03)  | 0.642  |
| <i>MEST-F</i>       | <b>12</b> | 166         | 0.27 (-2.07, 2.61)   | 0.819  |
| <i>MEG3_IG-M</i>    | 9         | <b>229</b>  | 1.69 (-0.35, 3.72)   | 0.105  |
| <i>MEG3_IG-F</i>    | 14        | <b>194</b>  | 0.27 (-1.71, 2.24)   | 0.790  |
| <i>MEG3-M</i>       | 11        | <b>248</b>  | 3.69 (0.10, 7.29)    | 0.044  |
| <i>MEG3-F</i>       | <b>12</b> | 227         | -1.95 (-5.55, 1.65)  | 0.286  |
| <i>IGF2-M</i>       | 6         | 146         | -0.05 (-4.27, 4.17)  | 0.981  |
| <i>IGF2-F</i>       | 9         | 143         | -3.67 (-6.79, -0.55) | 0.022  |
| <i>H19-M</i>        | 6         | <b>149</b>  | 0.66 (-2.06, 3.38)   | 0.631  |
| <i>H19-F</i>        | 13        | <b>150</b>  | 0.04 (-1.75, 1.83)   | 0.966  |

Linear regression for ART use for the index pregnancy and mean CpG methylation. We stratified models by sex and adjusted for pyrosequencing batch, pre-pregnancy maternal BMI, race, maternal age, diabetes, and parity. Estimates represent the mean percentage of methylation change associated with maternal use of ART (\*p < 0.05). **Bolded** values in table represent outlier removal (+/- 3sd from mean).
