# Supplementary material for: Clomifene and Assisted Reproductive Technology in Humans Are Associated with Sex-Specific Offspring Epigenetic Alterations in Imprinted Control Regions
Source: MDPI journal article supplement (doi:10.3390/ijms231810450), 2022-09-09
Supplement: s1 [file s1]

# Clomifene and Offspring Methylation

Change in Mean Methylation %

DMR

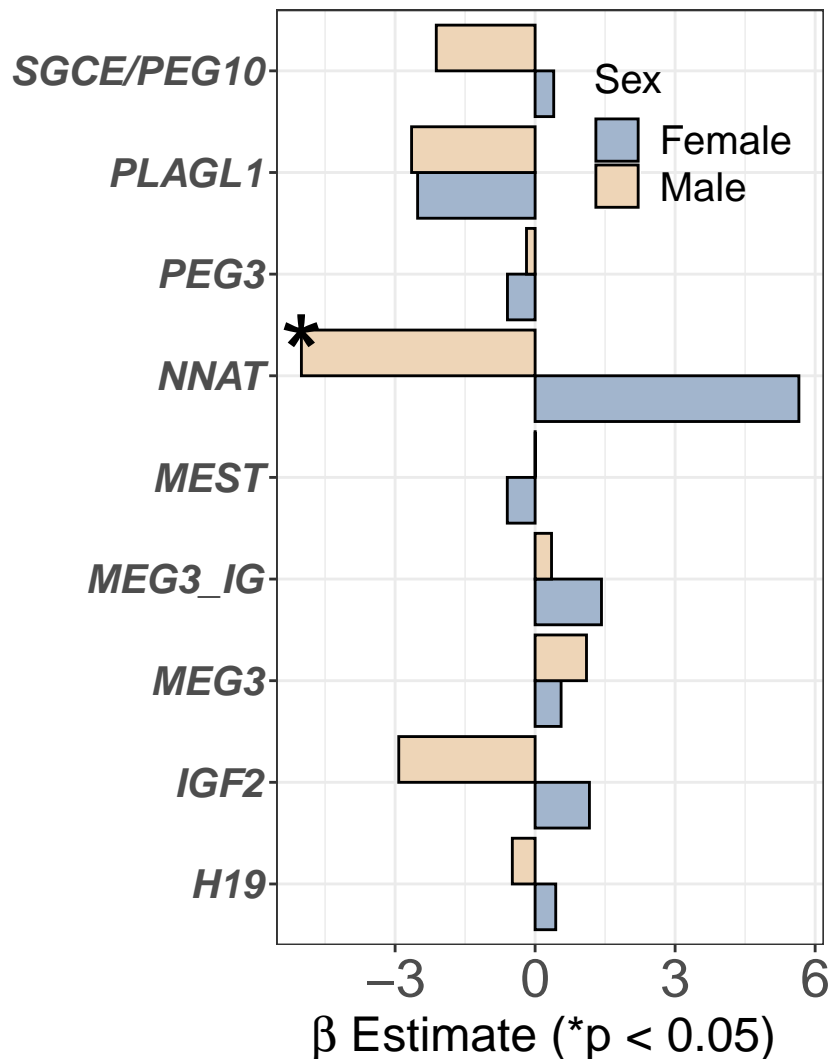

|                     | Cases(n) | Controls(n) | Estimate(95%CI)      | Pvalue |
|---------------------|----------|-------------|----------------------|--------|
| <i>SGCE/PEG10-M</i> | 11       | 94          | -2.12 (-4.75, 0.52)  | 0.114  |
| <i>SGCE/PEG10-F</i> | 7        | <b>77</b>   | 0.40 (-2.56, 3.36)   | 0.788  |
| <i>PLAGL1-M</i>     | 10       | 101         | -2.65 (-8.10, 2.81)  | 0.337  |
| <i>PLAGL1-F</i>     | 8        | <b>86</b>   | -2.52 (-8.66, 3.62)  | 0.416  |
| <i>PEG3-M</i>       | 10       | <b>95</b>   | -0.18 (-1.57, 1.20)  | 0.791  |
| <i>PEG3-F</i>       | 8        | <b>70</b>   | -0.59 (-2.28, 1.10)  | 0.485  |
| <i>NNAT-M</i>       | 11       | <b>83</b>   | -5.01 (-9.80, -0.22) | 0.041  |
| <i>NNAT-F</i>       | 8        | <b>66</b>   | 5.65 (-0.61, 11.91)  | 0.076  |
| <i>MEST-M</i>       | 10       | <b>90</b>   | 0.00 (-3.92, 3.92)   | 0.999  |
| <i>MEST-F</i>       | 7        | <b>77</b>   | -0.60 (-5.23, 4.04)  | 0.798  |
| <i>MEG3_IG-M</i>    | 11       | <b>137</b>  | 0.35 (-3.35, 4.05)   | 0.851  |
| <i>MEG3_IG-F</i>    | 10       | <b>107</b>  | 1.42 (-1.39, 4.24)   | 0.318  |
| <i>MEG3-M</i>       | 9        | <b>157</b>  | 1.10 (-5.33, 7.53)   | 0.736  |
| <i>MEG3-F</i>       | 10       | <b>134</b>  | 0.56 (-4.05, 5.16)   | 0.811  |
| <i>IGF2-M</i>       | 9        | 102         | -2.92 (-7.12, 1.27)  | 0.170  |
| <i>IGF2-F</i>       | 7        | 86          | 1.16 (-3.14, 5.46)   | 0.591  |
| <i>H19-M</i>        | 9        | 92          | -0.49 (-3.12, 2.14)  | 0.713  |
| <i>H19-F</i>        | 6        | 83          | 0.44 (-2.22, 3.10)   | 0.741  |

Linear regression for Clomifene use for the index pregnancy and mean CpG methylation. We stratified models by sex and adjusted for pyrosequencing batch, pre-pregnancy maternal BMI, race, maternal age, diabetes, and parity. Estimates represent the mean percentage of methylation change associated with maternal use of Clomifene (\*p < 0.05). Bolded values in table represent outlier removal (+/- 3sd from mean).
